# Supplementary material
Source: PubMed Central journal article supplement (PMC6700466)
Supplement: IMM-158-47-s002.pdf [file IMM-158-47-s002.pdf]

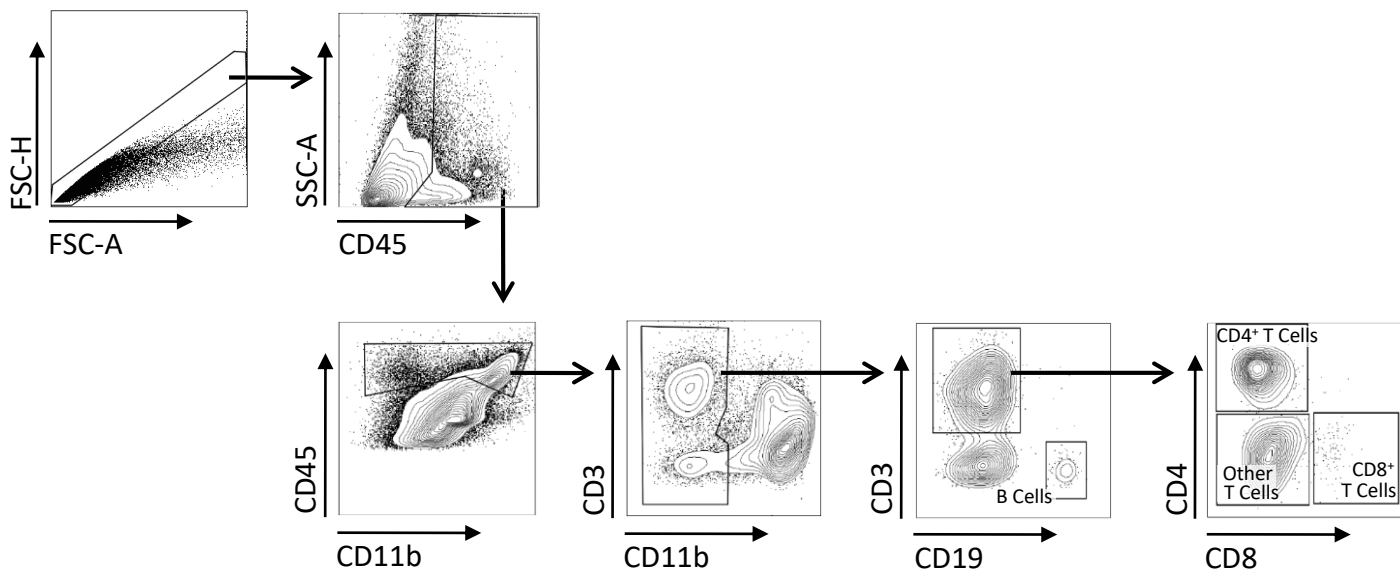

**Supplementary Figure S2.** Gating strategy for the flow cytometric analysis of lymphoid populations in mouse ear. Cell suspensions were prepared from individual ears of BALB/c mice inoculated with PBS (“PBS” group) or sensitized with SGE (“SGE” group) followed by exposure to the bites of 5 female mosquitoes, as described in Material and Methods. The ears of naïve mice were included as a steady-state condition. The cells were stained with fluorochrome-conjugated antibodies against murine CD45, CD11b, CD3, CD19, CD4 and CD8 to determine the major populations indicated in the figure.
