# Supplementary material
Source: PubMed Central journal article supplement (PMC6700466)
Supplement: IMM-158-47-s003.pdf [file IMM-158-47-s003.pdf]

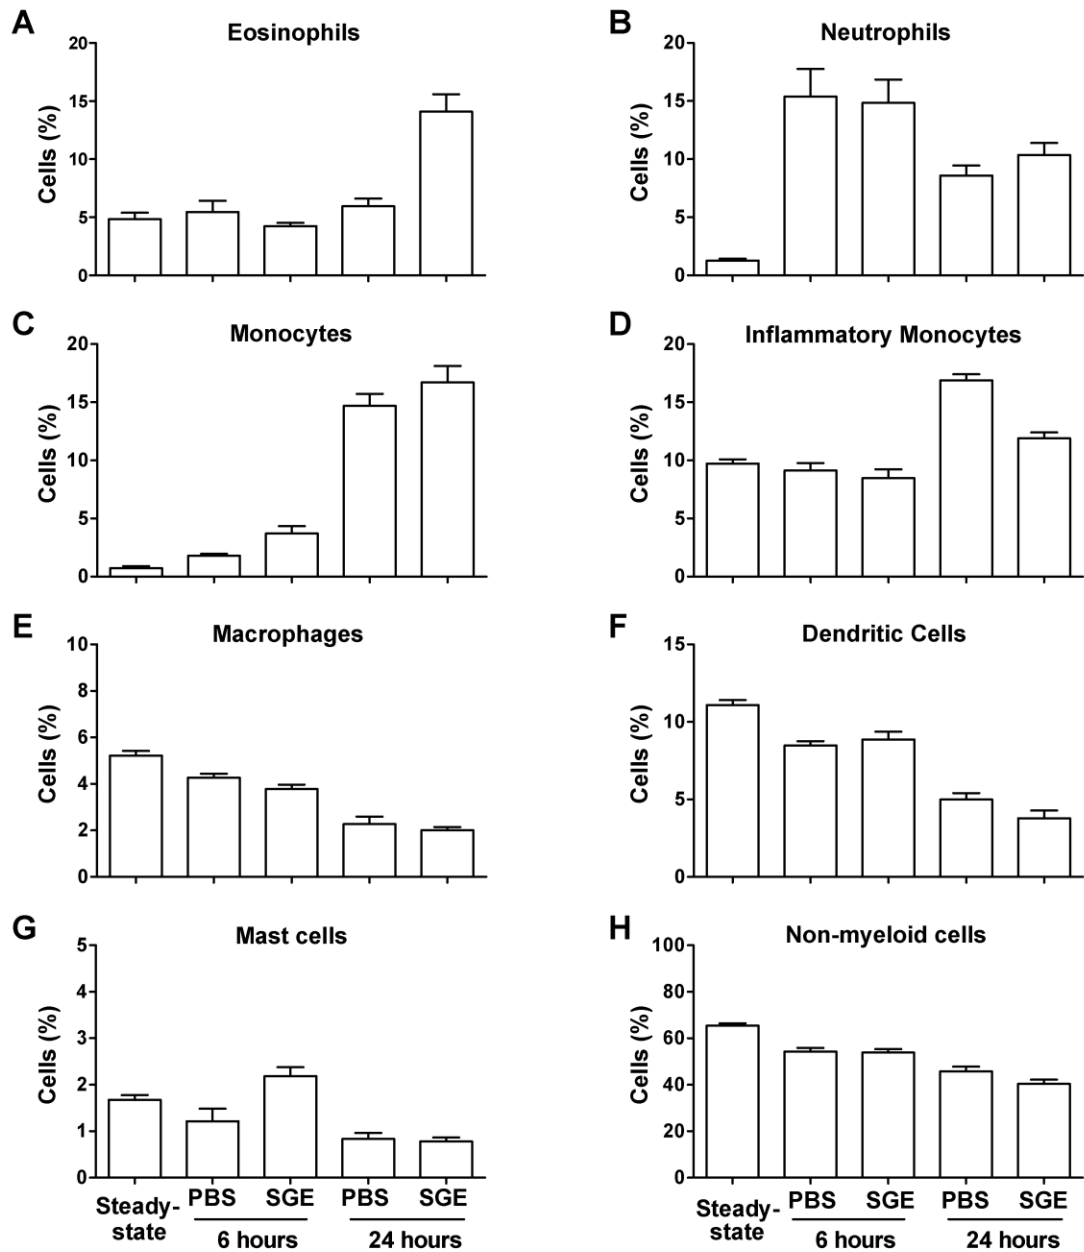

**Supplementary Figure S3.** Relative proportion of the myeloid infiltrate in the ear of non-sensitized and SGE-sensitized mice after exposure to *Ae. aegypti* bites. BALB/c mice were inoculated with PBS (“PBS” group) or sensitized with SGE (“SGE” group) followed by exposure of each ear to the bites of 5 female mosquitoes, as described in Material and Methods. The ears were collected after 6 and 24 h and analysed by flow cytometry. The ears of naïve mice were included as a reference to the steady-state condition. t-SNE analysis characterized each cell population as follows: (A) eosinophils; (B) neutrophils; (C) monocytes; (D) inflammatory monocytes; (E) macrophages; (F) dendritic cells; (G) mast cells; (H) non-myeloid cells.
