# Supplementary material
Source: PubMed Central journal article supplement (PMC6700466)
Supplement: IMM-158-47-s004.pdf [file IMM-158-47-s004.pdf]

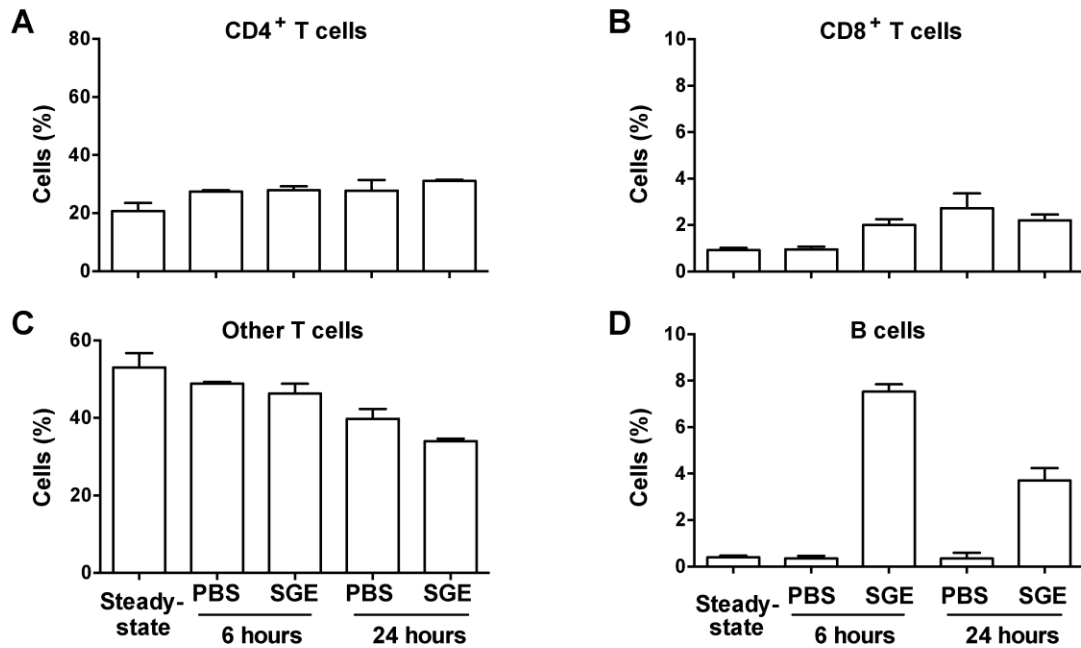

**Supplementary Figure S4.** Relative proportion of the lymphoid infiltrate in the ear of non-sensitized and SGE-sensitized mice after exposure to *Ae. aegypti* bites. BALB/c mice were inoculated with PBS (“PBS” group) or sensitized with SGE (“SGE” group) followed by exposure of each ear to the bites of 5 female mosquitoes, as described in Material and Methods. The ears were collected after 6 and 24 h and analysed by flow cytometry. The ears of naïve mice were included as a reference to the steady-state condition. t-SNE analysis characterized each cell population as follows: (A) CD4<sup>+</sup> T cells; (B) CD8<sup>+</sup> T cells; (C) other T cells; (D) B cells.
